# Supplementary material for: Inhibition of MZF1/c-MYC Axis by Cantharidin Impairs Cell Proliferation in Glioblastoma
Source: MDPI journal article supplement (doi:10.3390/ijms232314727), 2022-11-25
Supplement: s1 [file s1]

**Table S1.** Information of antibodies used in this study.

| Antibodies    | Species | dilution ratio; WB <sup>*</sup> | Source                    | Category No. |
|---------------|---------|---------------------------------|---------------------------|--------------|
| MZF1          | mouse   | WB: 1:1000x                     | Santa Cruz Biotechnology  | sc-293218    |
| GAPDH         | mouse   | WB: 1:10000x                    | EMD Millipore             | MAB374       |
| c-MYC         | rabbit  | WB: 1:1000x                     | Abcam                     | ab32072      |
| DDK (Flag)    | rabbit  | WB: 1:1000x                     | Cell Signaling Technology | #14793       |
| alpha-Tubulin | mouse   | WB: 1:10000x                    | Proteintech Group, Inc.   | 66,009-1-Ig  |

<sup>\*</sup>WB: western blot

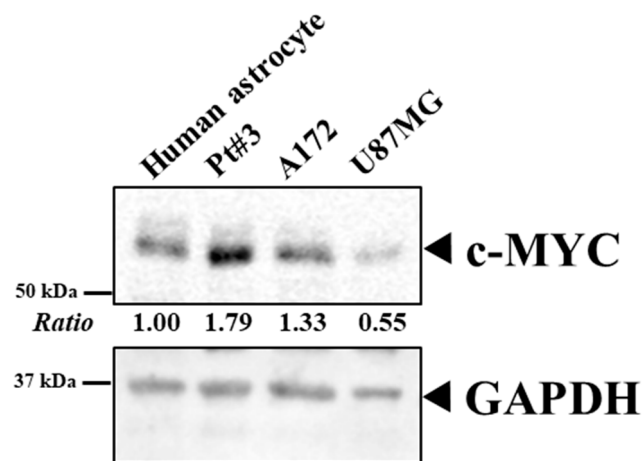

**Figure S1.** The endogenous c-MYC protein levels in Pt#3 and A172 cells are markedly higher than those in human astrocyte and U87MG cells. Western blot image of the level of c-MYC protein in human primary astrocytes and gliomas (PT#3, A172, and U87MG).
